# Supplementary material for: Is the rapid initial performance loss of Fe/N/C non precious metal catalysts due to micropore flooding?
Source: Royal Society of Chemistry journal article supplement (doi:10.1039/c6ee03005j), 2016-12-07
Supplement: c6ee03005j1.pdf [file c6ee03005j1.pdf]

## Supporting Information

### **Is the rapid initial performance loss of Fe/N/C non precious metal catalysts due to micropore flooding?**

Ja-Yeon Choi,<sup>a</sup> Lijun Yang,<sup>b</sup> Takeaki Kishimoto,<sup>c</sup> Xiaogang Fu,<sup>a</sup> Siyu Ye,<sup>b</sup> Zhongwei Chen<sup>a\*</sup> and Dustin Banham<sup>b\*</sup>

<sup>a</sup> Department of Chemical Engineering, University of Waterloo, 200 University Ave. W., Waterloo, ON, Canada, N2L 3G1. Email: zhwchen@uwaterloo.ca

<sup>b</sup> Ballard Power Systems, 9000 Glenlyon Parkway, Burnaby, BC, Canada, V5J 5J8. Email: dustin.banham@ballard.com

<sup>c</sup> Nisshinbo Holdings Inc., Business Development Dept., 1-2-3 Onodai, Midori-ku, Chiba, Japan, 267-0056.

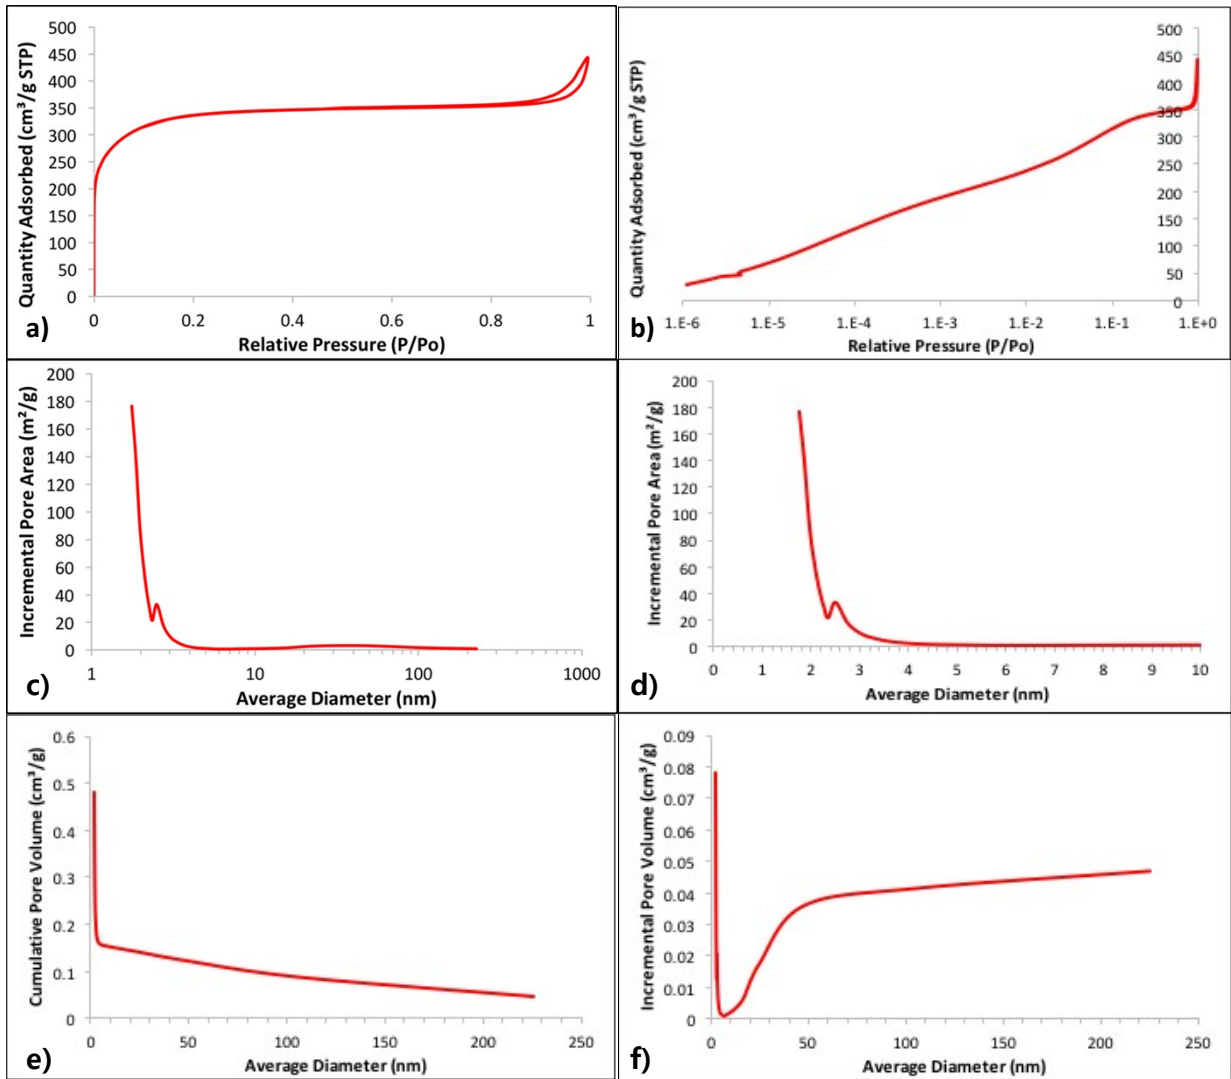

**Figure S1:** (a,b) N<sub>2</sub> sorption isotherm, (c,d) pore size distributions, (e) cumulative pore volume and (f) pore volume distribution for Fe-N-C-Phen-PANI catalyst

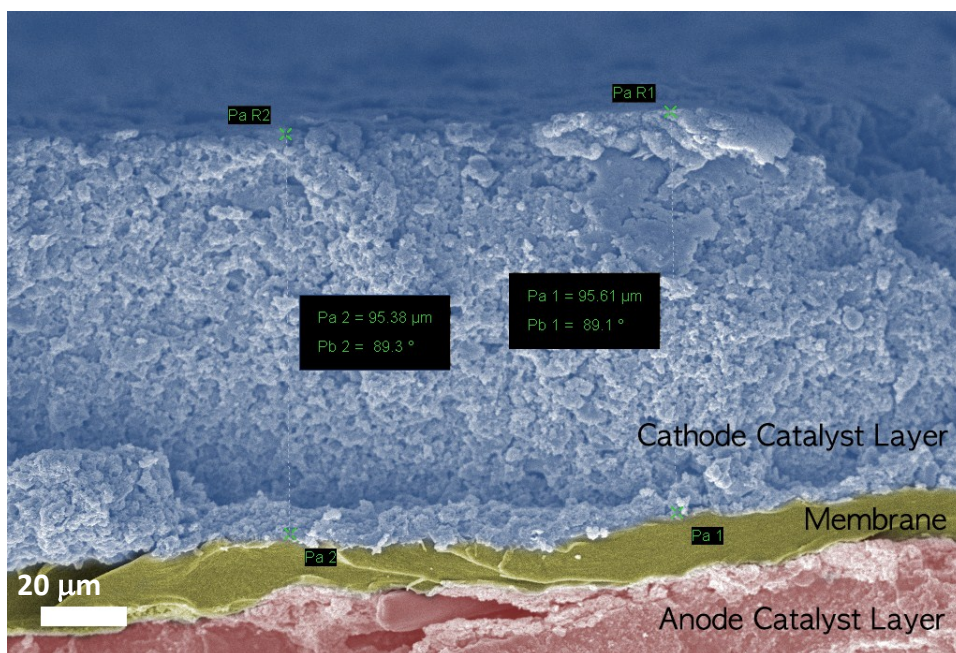

**Figure S2:** Cross-sectional SEM image of MEA and the thickness measurement of the cathode catalyst layer with Fe-N-C-Phen-PANI catalyst.

**Table S1:** Elemental composition of the Fe-N-C-Phen-PANI catalyst obtained by EDX

|                  | C (Wt. %) | N (Wt. %) | O (Wt. %) | S (Wt. %) | Fe (Wt. %) |
|------------------|-----------|-----------|-----------|-----------|------------|
| Fe-N-C-Phen-PANI | 89.41     | 4.45      | 4.31      | 0.12      | 1.71       |
